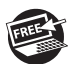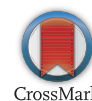

COMMENT ON DURAN ET AL.

# Introduction of IADPSG Criteria for the Screening and Diagnosis of Gestational Diabetes Mellitus Results in Improved Pregnancy Outcomes at a Lower Cost in a Large Cohort of Pregnant Women: The St. Carlos Gestational Diabetes Study. *Diabetes Care* 2014;37:2442–2450

*Diabetes Care* 2015;38:e40 | DOI: 10.2337/dc14-2414

René Rodríguez-Gutiérrez and  
José Gerardo González-González

We read with interest the article by Duran et al. (1) in which the authors sought to evaluate the outcomes and the cost-effectiveness of the one-step International Association of the Diabetes and Pregnancy Study Groups (IADPSG) criteria for screening and diagnosis of gestational diabetes mellitus (GDM) compared with the two-step Carpenter-Coustan (CC) criteria. Their findings show that the IADPSG criteria increased the GDM rate (35.5% vs. 10.6%) but improved pregnancy outcomes, such as decreases in gestational hypertension, prematurity, cesarean section, and small and large for gestational age. Additionally, IADPSG criteria were estimated to save more than €14,000 per 100 women studied when compared with the CC criteria. However, a critical methodological problem has to be

addressed. In their methods section, they state that for the two-step approach they performed the O'Sullivan test (50-g glucose challenge test) after a 12-h fast with no dietary restrictions. It is well known since the original description of the O'Sullivan test that it must be performed under a nonfasting state and irrespective of the time of the day (2). If positive, the next step would be to proceed with the 100-g oral glucose tolerance test and this is supported by all current clinical guidelines, recommendations, and studies in this area (3,4). The fact that this was omitted has important implications in the interpretation of the results as performing the O'Sullivan test in a fasting state could have underestimated the number of patient candidates for the second step who could

potentially have been diagnosed with GDM (2–4).

**Duality of Interest.** No potential conflicts of interest relevant to this article were reported.

## References

1. Duran A, Sáenz S, Torrejón MJ, et al. Introduction of IADPSG criteria for the screening and diagnosis of gestational diabetes mellitus results in improved pregnancy outcomes at a lower cost in a large cohort of pregnant women: the St. Carlos Gestational Diabetes Study. *Diabetes Care* 2014;37:2442–2450
2. O'Sullivan JB, Mahan CM. Criteria for the oral glucose tolerance test in pregnancy. *Diabetes* 1964;13:278–285
3. American Diabetes Association. Diagnosis and classification of diabetes mellitus. *Diabetes Care* 2014;37(Suppl. 1):S81–S90
4. Committee on Practice Bulletins—Obstetrics. Practice Bulletin No. 137: Gestational diabetes mellitus. *Obstet Gynecol* 2013;122:406–416

Endocrinology Division, University Hospital “Dr. José E. González,” Facultad de Medicina, Universidad Autónoma de Nuevo León, Monterrey, Mexico  
Corresponding author: René Rodríguez-Gutiérrez, [renerodriguez@investigacion-meduanl.com](mailto:renerodriguez@investigacion-meduanl.com).

© 2015 by the American Diabetes Association. Readers may use this article as long as the work is properly cited, the use is educational and not for profit, and the work is not altered.
